# Supplementary material
Source: PubMed Central journal article supplement (PMC3128403)
Supplement: supp_amiajnl-2011-000108_JAMIA_Appendix1_000108.pdf [file supp_amiajnl-2011-000108_JAMIA_Appendix1_000108.pdf]

## Online supplement 1

### A Discussion

#### A.1. *Inter-annotator agreement (IAA)*

The low agreement in UPMC radiology reports is due to the fact that A1 missed a number of pairs that involve markables of type anatomy. For example, as Table Supplement 1 (a) shows, A1 failed to identify the relations among all 13 anatomy pairs that are related to the spine. These pairs were, however, captured by A3, and reflected subsequently in the gold standard.

The complementary nature of the annotations is further supported by our error analysis. Examining the IAA scores for the files in the set with the lowest score (p6) (Table Supplement 1 (b)) shows that a Mayo Clinic pathology report doc210 had an IAA of 0.16, with only one overlapping annotation (true positive). The full set of annotations in this report is in Table Supplement (c). There was only one overlapping annotation before the consensus stage. After the consensus stage, all but three of the original annotations were included in the gold standard. Figures 2, 3 and 4 show the contributions of each annotator in the UPMC and Mayo reports. Overall in UPMC reports, A1 and A3 individually contributed 41% and 42% to the gold standard, respectively, and only 18% were from both annotators. In the Mayo reports, the contributions are 10%, 12%, 24% for A1, A2, and A3 respectively, and 54% from two annotators. In general, A3, who had more domain and linguistic knowledge than the other annotators, contributed more pairs than any other annotator.

#### IAA Examples

Savova “Anaphoric relations in the clinical domain”

| Antecedent ID | Anaphor ID | Relation type | Antecedent span offsets | Antecedent text      | Anaphor span offsets | Anaphor text         |
|---------------|------------|---------------|-------------------------|----------------------|----------------------|----------------------|
| 2.1           | 2.2        | #identity     | 185-197                 | SPINE LUMBAR         | 307-317              | lower back           |
| 2.2           | 2.3        | #identity     | 307-317                 | lower back           | 420-436              | the lumbar spine     |
| 2.3           | 2.4        | #part/whole   | 420-436                 | the lumbar spine     | 475-495              | the L5-S1 disc space |
| 2.3           | 2.5        | #identity     | 420-436                 | the lumbar spine     | 568-584              | the lumbar           |
| 2.3           | 2.6        | #part/whole   | 420-436                 | the lumbar spine     | 672-677              | L1-L2                |
| 2.3           | 2.7        | #part/whole   | 420-436                 | the lumbar spine     | 679-684              | L2-L3                |
| 2.3           | 2.8        | #part/whole   | 420-436                 | the lumbar spine     | 686-691              | L3-L4                |
| 2.3           | 2.9        | #part/whole   | 420-436                 | the lumbar spine     | 696-702              | L4- L5               |
| 2.4           | 2.13       | #identity     | 475-495                 | the L5-S1 disc space | 1402-1407            | L5-S1                |
| 2.7           | 2.1        | #identity     | 679-684                 | L2-L3                | 843-848              | L2-L3                |
| 2.8           | 2.11       | #identity     | 686-691                 | L3-L4                | 956-961              | L3-L4                |
| 2.9           | 2.12       | #identity     | 696-702                 | L4- L5               | 1145-1150            | L4-L5                |
| 2.12          | 2.14       | #identity     | 1145-1150               | L4-L5                | 1594-1599            | L4-L5                |

(a) Annotations for UPMC report 101

|                       | doc224 | doc161 | doc190 | doc210 |
|-----------------------|--------|--------|--------|--------|
| <i>True Positive</i>  | 5      | 2      | 4      | 1      |
| <i>False Positive</i> | 3      | 4      | 6      | 6      |
| <i>False Negative</i> | 4      | 7      | 13     | 4      |
| <i>Precision</i>      | 0.6250 | 0.3333 | 0.4000 | 0.1429 |
| <i>Recall</i>         | 0.5556 | 0.2222 | 0.2353 | 0.2000 |
| <i>F-Score</i>        | 0.5882 | 0.2667 | 0.2963 | 0.1667 |
| <i>Kappa</i>          | 0.5854 | 0.2623 | 0.2939 | 0.1622 |

(b) IAA results per document from p6 set (Mayo pathology notes set 6)

| Antecedent ID | Anaphor ID | Relation type | Antecedent span offsets | Antecedent text                       | Anaphor span offsets | Anaphor text                          |
|---------------|------------|---------------|-------------------------|---------------------------------------|----------------------|---------------------------------------|
| 1.1           | 1.4        | #identity     | 35-40;42-49             | Colon ... sigmoid                     | 110-117              | colonic                               |
| 2.1           | 2.4        | #part/whole   | 35-49                   | Colon, sigmoid                        | 110-117              | colonic                               |
| 2.1           | 2.7        | #part/whole   | 35-49                   | Colon, sigmoid                        | 204-232              | the closest resection margin          |
| 2.1           | 2.9        | #part/whole   | 35-49                   | Colon, sigmoid                        | 273-283              | muscularis                            |
| 2.1           | 2.12       | #part/whole   | 35-49                   | Colon, sigmoid                        | 318-355              | Proximal and distal resection margins |
| 1.3           | 1.6        | #identity     | 95-132                  | Grade 3 (of 4) colonic adenocarcinoma | 155-181              | a mass, 5.5 x 3.8 x 1.3 cm            |
| 1.4           | 1.9        | #part/whole   | 110-117                 | colonic                               | 269-283              | the muscularis                        |
| 2.5           | 2.6        | #identity     | 118-132                 | adenocarcinoma                        | 155-161              | a mass                                |
| 1.6           | 1.8        | #identity     | 155-181                 | a mass, 5.5 x 3.8 x 1.3 cm            | 247-252              | Tumor                                 |
|               |            |               | 155-161                 | a mass                                | 247-252              | Tumor                                 |
| 2.7           | 2.12       | #set/subset   | 204-232                 | the closest resection margin          | 318-355              | Proximal and distal resection margins |
| 1.11          | 1.13       | #set/subset   | 382-393;401-424         | Multiple (3 ... pericolic lymph nodes | 397-424              | 15) pericolic lymph nodes             |

(c) Annotations for Mayo clinical note doc210. All but the grey shaded annotations were included in the gold standard after the consensus

Table Supplement 1: IAA Examples
